# Supplementary material for: Exposure to Second-Hand Smoke and the Risk of Tuberculosis in Children and Adults: A Systematic Review and Meta-Analysis of 18 Observational Studies
Source: PubMed Central journal article supplement (PMC4452762; doi:10.1371/journal.pmed.1001835), 2015-06-02
Supplement: pmed.1001835.s002.pdf [file pmed.1001835.s002.pdf]

**Supplementary Table 1: Quality assessment using Newcastle-Ottawa Scale.**

| Cohort studies                 |                                          |                                     |                           |                                                                                  |                                                                        |                           |                                                     |                                  |             |              |
|--------------------------------|------------------------------------------|-------------------------------------|---------------------------|----------------------------------------------------------------------------------|------------------------------------------------------------------------|---------------------------|-----------------------------------------------------|----------------------------------|-------------|--------------|
| Study                          | Selection                                |                                     |                           | Demonstration that the outcome of interest was not present at start of the study | Comparability                                                          |                           | Outcome                                             |                                  | Total stars | Good quality |
|                                | Representativeness of the exposed cohort | Selection of the non exposed cohort | Ascertainment of exposure |                                                                                  | Comparability of cohorts on the basis of design or analysis            | Assessment of outcome     | Was follow-up long enough for the outcome to occur? | Adequacy of follow up of cohorts |             |              |
| Leung et al 2010               | *                                        | *                                   | *                         | *                                                                                | **                                                                     | *                         | *                                                   | *                                | 8           | Yes          |
| Lin et al 2013                 | *                                        | *                                   | *                         | *                                                                                | **                                                                     | *                         | *                                                   | *                                | 9           | Yes          |
| Cross-sectional studies †      |                                          |                                     |                           |                                                                                  |                                                                        |                           |                                                     |                                  |             |              |
| Study                          | Selection                                |                                     |                           | Ascertainment of exposure                                                        | Comparability                                                          |                           | Outcome                                             |                                  | Total stars | Good quality |
|                                | Representativeness of the exposed sample | Selection of the non exposed sample |                           |                                                                                  | Comparability of outcome groups on the basis of design or analysis     | Assessment of outcome     | Statistical test is appropriate                     |                                  |             |              |
| Lindsay et al. 2014            | *                                        | *                                   |                           | *                                                                                | **                                                                     | *                         | *                                                   |                                  | 7           | Yes          |
| Babayigit-Hocaoglu et al. 2011 |                                          | *                                   |                           | *                                                                                |                                                                        | *                         |                                                     |                                  | 3           | No           |
| Den Boon et al. 2007           | *                                        | *                                   |                           | *                                                                                | **                                                                     | *                         | *                                                   |                                  | 7           | Yes          |
| Du Preez et al 2011            | *                                        | *                                   |                           | *                                                                                | **                                                                     | *                         | *                                                   |                                  | 7           | Yes          |
| Singh et al 2005               |                                          | *                                   |                           |                                                                                  | *                                                                      | *                         | *                                                   |                                  | 4           | No           |
| Shin et al 2013                |                                          | *                                   |                           | *                                                                                | *                                                                      | *                         | *                                                   |                                  | 5           | No           |
| Case-control studies           |                                          |                                     |                           |                                                                                  |                                                                        |                           |                                                     |                                  |             |              |
| Study                          | Selection                                |                                     |                           | Definition of controls                                                           | Comparability                                                          |                           | Exposure                                            |                                  | Total stars | Good quality |
|                                | Is the case definition adequate?         | Representativeness of the cases     | Selection of controls     |                                                                                  | Comparability of cases and controls on the basis of design or analysis | Ascertainment of exposure | Same method of ascertainment for cases and controls | Non-response rate                |             |              |
| Tipayamongkholgul et al 2005   | *                                        | *                                   |                           | *                                                                                | **                                                                     | *                         | *                                                   | *                                | 8           | Yes          |
| Altet 1996                     | *                                        |                                     |                           | *                                                                                | **                                                                     | *                         | *                                                   | *                                | 7           | Yes          |
| Ariyothai 2004                 | *                                        |                                     | *                         | *                                                                                | **                                                                     | *                         | *                                                   | *                                | 8           | Yes          |
| Alcaide 1996                   | *                                        |                                     |                           | *                                                                                | **                                                                     | *                         | *                                                   | *                                | 7           | Yes          |
| Patra et al 2012               | *                                        | *                                   |                           | *                                                                                | **                                                                     | *                         | *                                                   | *                                | 7           | Yes          |
| Ramachandran et al 2011        | *                                        | *                                   | *                         | *                                                                                | **                                                                     | *                         | *                                                   | *                                | 8           | Yes          |
| Ozturk 2014                    | *                                        |                                     |                           | *                                                                                |                                                                        | *                         | *                                                   | *                                | 3           | No           |
| Gupta et al 2013               | *                                        |                                     | *                         | *                                                                                | **                                                                     | *                         | *                                                   | *                                | 7           | Yes          |
| Garcia et al                   | *                                        | *                                   |                           | *                                                                                |                                                                        | *                         | *                                                   |                                  | 4           | No           |
| Jubulis et al 2014             | *                                        |                                     | *                         | *                                                                                | **                                                                     | *                         | *                                                   | *                                | 7           | Yes          |

† We used a modified NOS scale for cross-sectional studies. Note: A score of 7 or higher was considered good study (see Supplementary Text S3 for references and original and modified scales).
